# Supplementary material
Source: MDPI journal article supplement (https://www.mdpi.com/1424-2818/11/9/157)
Supplement: s1 [file s1]

## Supplemental Materials (Tables and Figures)

**Table S1.** Critical values ( $q_{0.05,4}$ ), absolute difference between mean of ranks ( $|R_A - R_B|$ ), standard errors (SE), and test statistics ( $q$ ) to assess statistical significance, at  $\alpha = 0.05$ , of any differences among the four time groups (1 = 1984–1991, 2 = 1992–1999, 3 = 2000–2007, and 4 = 2008–2015) for total annual area of CESF patches >100 ha using the Nemenyi non-parametric test for multiple comparisons between groups with an equal sample size ( $n = 8$  years for each time group). Statistical significance of levels of  $q$  are shown as “Y” (significant) or “N” (not significant).

| Time Group Comparison | $q_{0.05,4}$ | $ R_A - R_B $ | SE    | $q$  | Significant?<br>(Is $q > q_{0.05,4}$ ?) |
|-----------------------|--------------|---------------|-------|------|-----------------------------------------|
| 1–2                   | 3.63         | 17.5          | 26.53 | 0.66 | N                                       |
| 1–3                   | 3.63         | 98.5          | 26.53 | 3.71 | Y                                       |
| 1–4                   | 3.63         | 107.5         | 26.53 | 4.05 | Y                                       |
| 2–3                   | 3.63         | 81.0          | 26.53 | 3.05 | N                                       |
| 2–4                   | 3.63         | 90.0          | 26.53 | 3.39 | N                                       |
| 3–4                   | 3.63         | 9.0           | 26.53 | 0.34 | N                                       |

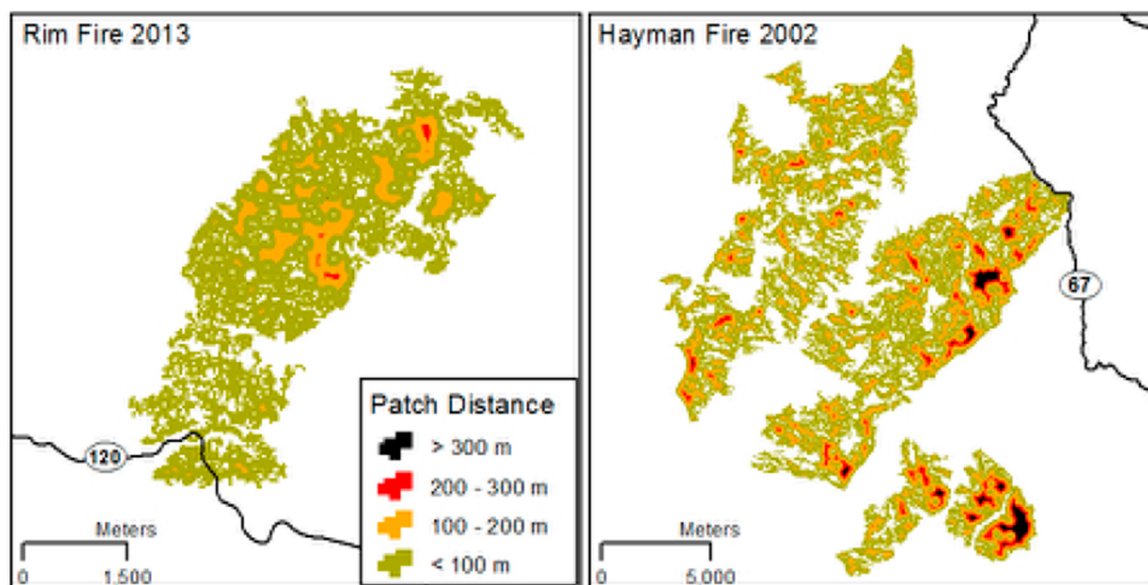

**Figure S1.** Example of CESF patches >1,000 ha, showing distances from areas of unburned, low, and moderate severity fire within the patch boundaries in the Rim (Stanislaus National Forest, CA) and Hayman fires (Colorado Front Range).

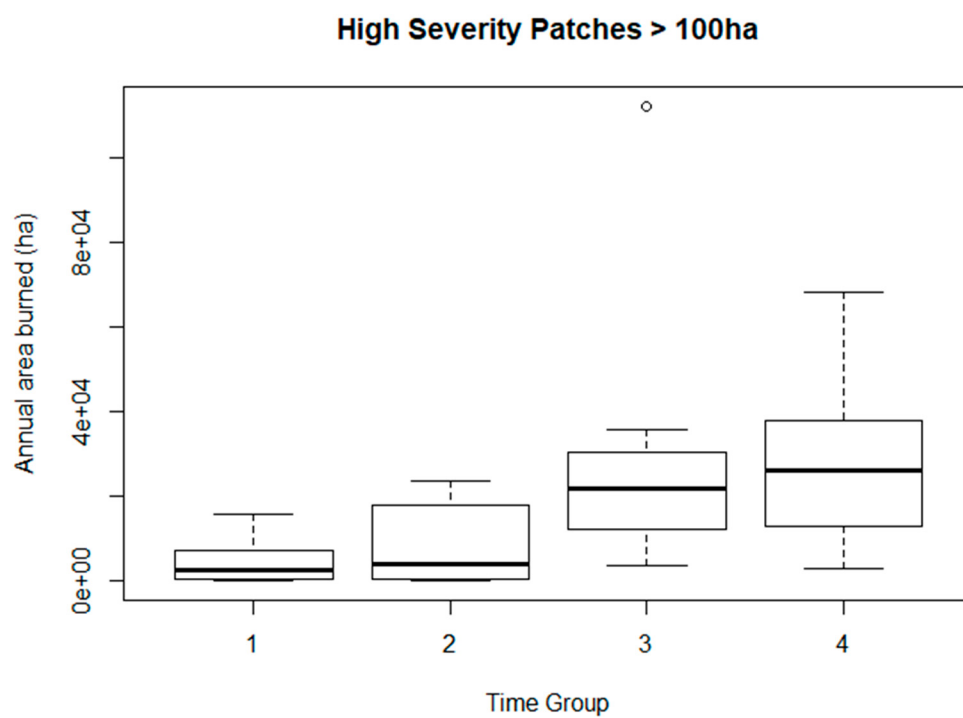

**Figure S2.** Annual area of large patches (>100 ha) of CESF in the four time periods.
